# Supplementary material for: Osteogenic cocktail induces calcifications in human breast cancer cell line via placental alkaline phosphatase expression
Source: PubMed Central journal article supplement (PMC7391638; doi:10.1038/s41598-020-69622-7), 2020-07-29

## **SUPPLEMENTARY INFORMATION**

### **Osteogenic cocktail induces calcifications in human breast cancer cell line via placental alkaline phosphatase expression**

Atsushi Fushimi<sup>1,2</sup>, Hiroshi Takeyama<sup>2</sup>, Toshiaki Tachibana<sup>1</sup>, and Yoshinobu Manome<sup>1</sup>

<sup>1</sup>Core Research Facilities, The Jikei University School of Medicine, Tokyo, Japan

<sup>2</sup>Department of Surgery, The Jikei University School of Medicine, Tokyo, Japan

**Correspondence to:** Atsushi Fushimi, Core Research Facilities, The Jikei University School of Medicine, 3-25-8, Nishi-shimbashi, Minato-ku, Tokyo, Japan. Tel.: +81 334331111, Fax: +81 354001387, e-mail: [fushimi@jikei.ac.jp](mailto:fushimi@jikei.ac.jp)

**Supplementary Table 1. Details of elemental analysis of calcification in MDA-MB-****231 cells (HITACHI TM4000 HV 15.0, keV 1000×, WD 9.4 mm)**

| <b>Element</b> | <b>Atomic number</b> | <b>Net count</b> | <b>Mass (%)</b> | <b>Atomic concentration (%)</b> | <b>Absolute error (1<math>\sigma</math>) (%)</b> | <b>Relative error (1<math>\sigma</math>) (%)</b> |
|----------------|----------------------|------------------|-----------------|---------------------------------|--------------------------------------------------|--------------------------------------------------|
| C              | 6                    | 216696           | 55.09           | 64.18                           | 6.01                                             | 10.90                                            |
| N              | 7                    | 5237             | 6.14            | 6.14                            | 0.98                                             | 15.93                                            |
| O              | 8                    | 70889            | 29.32           | 25.64                           | 3.40                                             | 11.59                                            |
| Na             | 11                   | 17163            | 1.27            | 0.77                            | 0.11                                             | 8.29                                             |
| P              | 15                   | 81628            | 3.63            | 1.64                            | 0.16                                             | 4.51                                             |
| Cl             | 17                   | 17359            | 0.93            | 0.37                            | 0.06                                             | 6.14                                             |
| Ca             | 20                   | 43473            | 3.62            | 1.26                            | 0.13                                             | 3.71                                             |



**Supplementary Figure 2. Vector-based enforced expression of PLAP in MDA-MB-**

**468 cells induced calcifications when cultured with the osteogenic cocktail (OC). (a)**

PLAP expression was confirmed on MDA-MB-468 cells based on its vector-based

enforced expression using western blots. (b, c) Alizarin staining shows calcification

induced by PLAP-expressed MDA-MB-468 cells cultured with OC for 6 weeks (c:

magnification  $\times 20$ , scale bar  $10\ \mu\text{m}$ ).

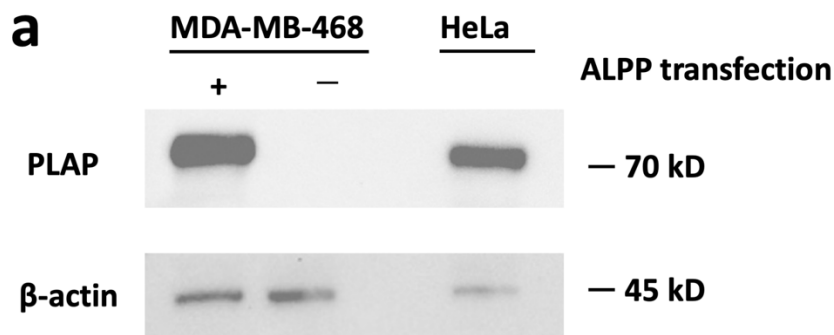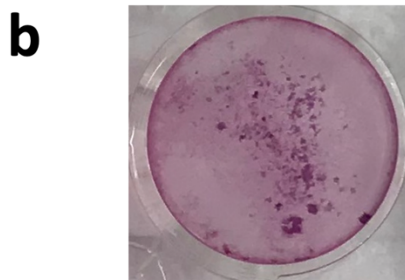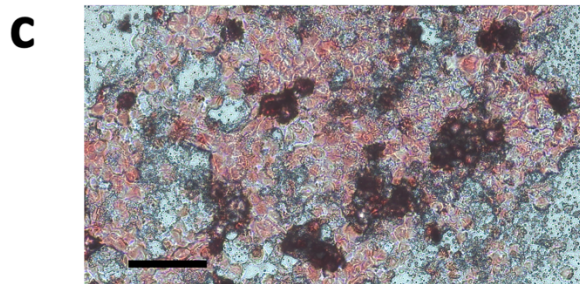

**Supplementary Figure 3. PLAP mRNA in MDA-MB-231 cells pharmacologically inhibited the PI3K-Akt pathway when cultured with the osteogenic cocktail (OC).**

(a) MDA-MB-231 cells were cultured for 7 days with vehicle, OC+vehicle, OC+Akt inhibitor X, and OC+AZD-8055. Two or three asterisks indicate P value less than 0.01 or 0.001, respectively. (b) MDA-MB-231 cells were cultured for 7 days with vehicle, OC+vehicle, and OC+LY294002 (20, 40, and 60  $\mu$ M). One asterisk indicates P value less than 0.05.

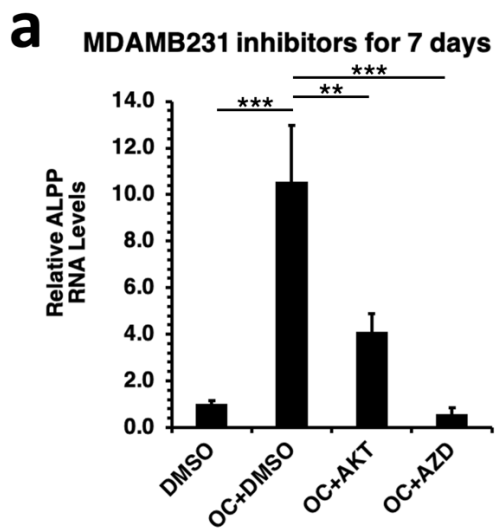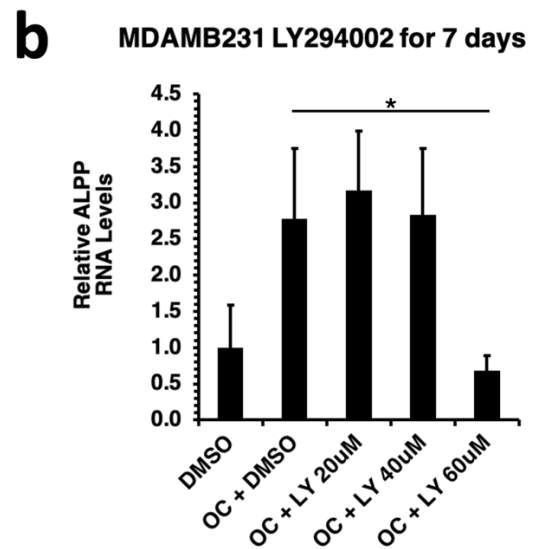

**Supplementary Table 2. List of primers used for qRT-PCR and cloning**

| <b>Primer</b>       | <b>Forward (5'–3')</b>         | <b>Reverse (5'–3')</b>         |
|---------------------|--------------------------------|--------------------------------|
| GAPDH               | CCCAGCAAGAGCACAAAGAG           | CCTCTTCAAGGGGTCTACATG          |
| ALPP<br>for qRT-PCR | GACTACAGCCAAGGTGGGAC           | GACCTTTGGCTCTCGACCAG           |
| ALPP<br>for cloning | CCAGACATGCTGGGGCCCTGCATGCTGCTG | CCCAGGGACGGGACACTCAGGGAGCAGTGG |

Figure 3a - PLAP

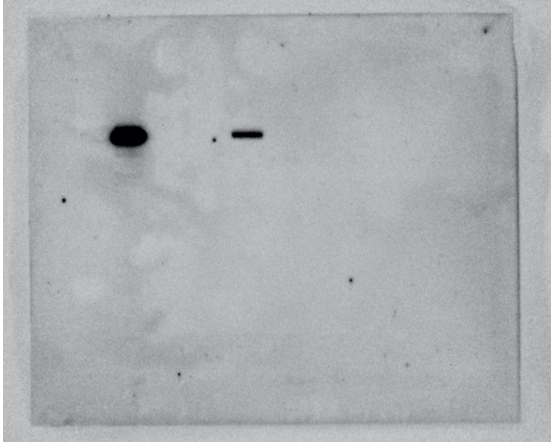

Figure 4a - PLAP

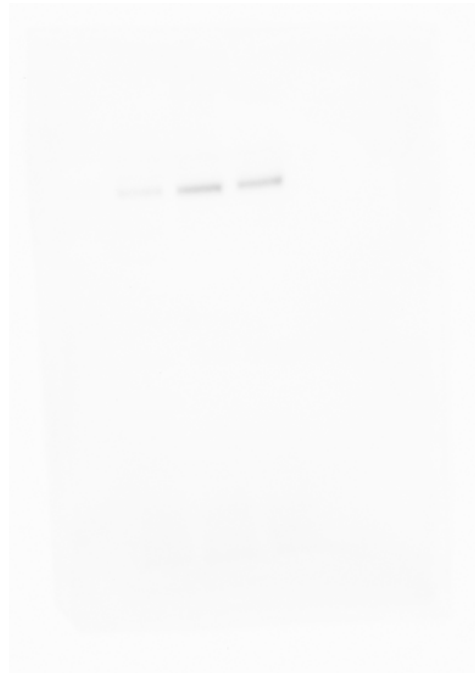

Figure 3a - TNAP

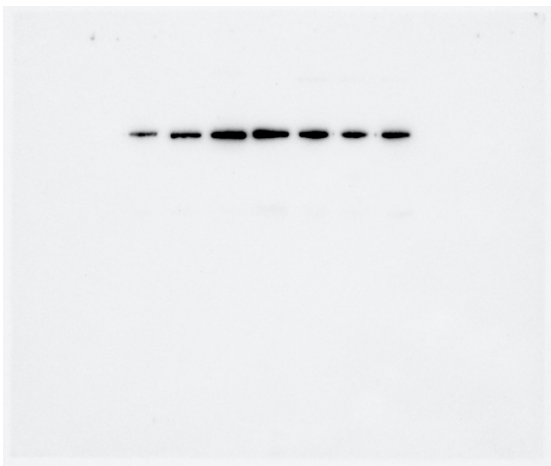

Figure 4a -  $\beta$ -actin

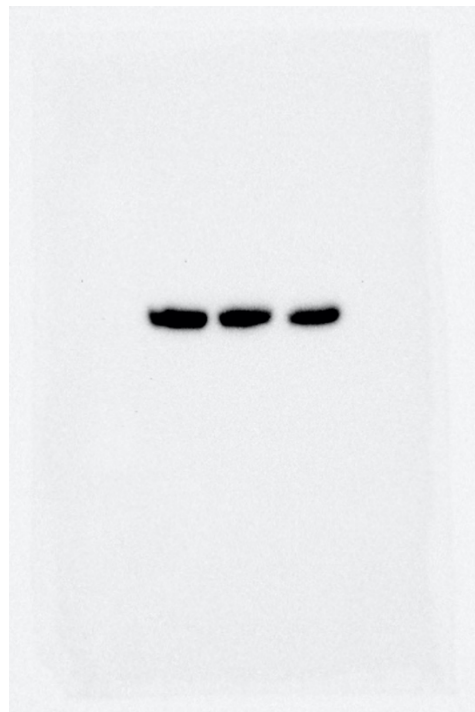

Figure 3a -  $\beta$ -actin

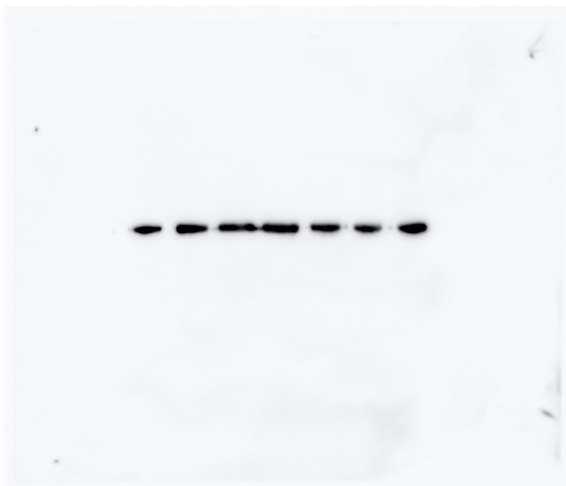

Figure 5a - PLAP

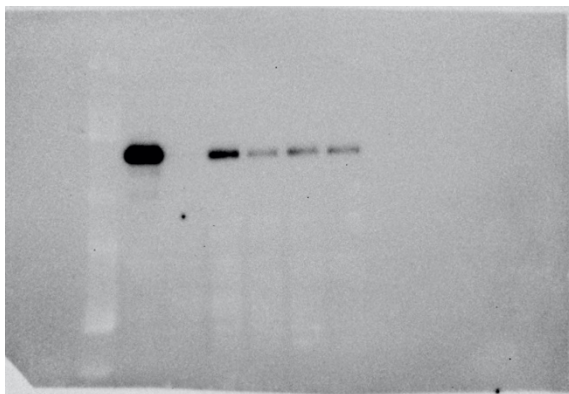

Figure 5a -  $\beta$ -actin

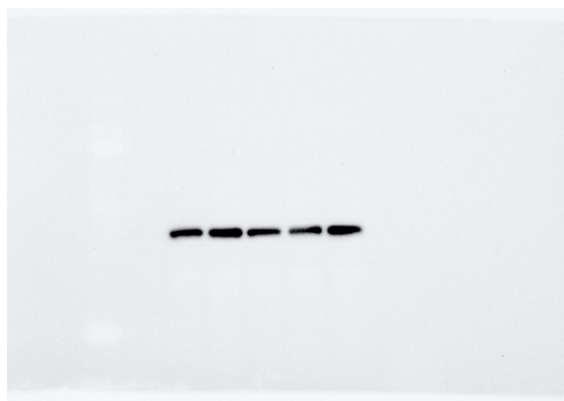

Figure 5a - c-Jun

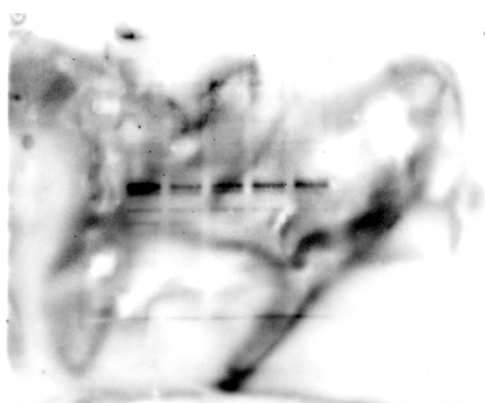

Supplementary Figure 2a - PLAP

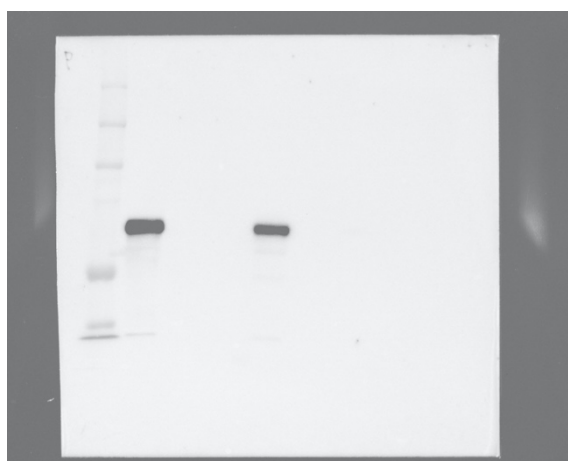

Figure 5a - Phospho-c-Jun

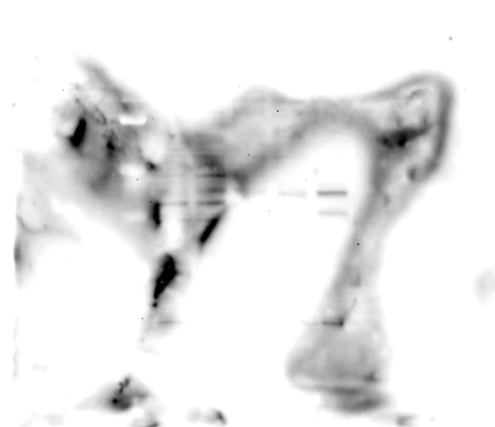

Supplementary Figure 2a -  $\beta$ -actin

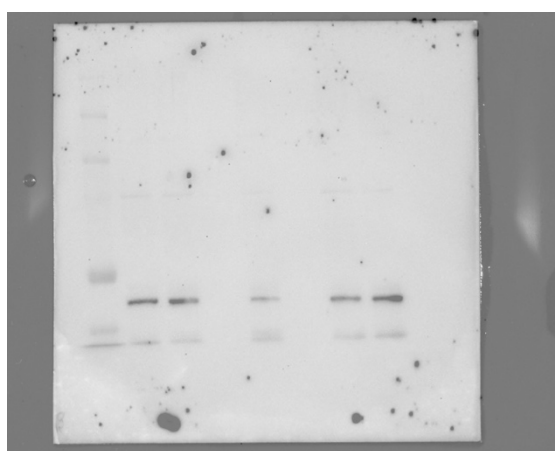

Supplement: 41598_2020_69622_MOESM1_ESM.pdf [file 41598_2020_69622_MOESM1_ESM.pdf]
